# Supplementary material for: Adherence to the guidelines and the pathological diagnosis of high-risk gastrointestinal stromal tumors in the real world
Source: PubMed Central journal article supplement (PMC6942594; doi:10.1007/s10120-019-00966-4), 2019-04-30

Supplement Figure 1. The scheme of the registry study and consort diagram

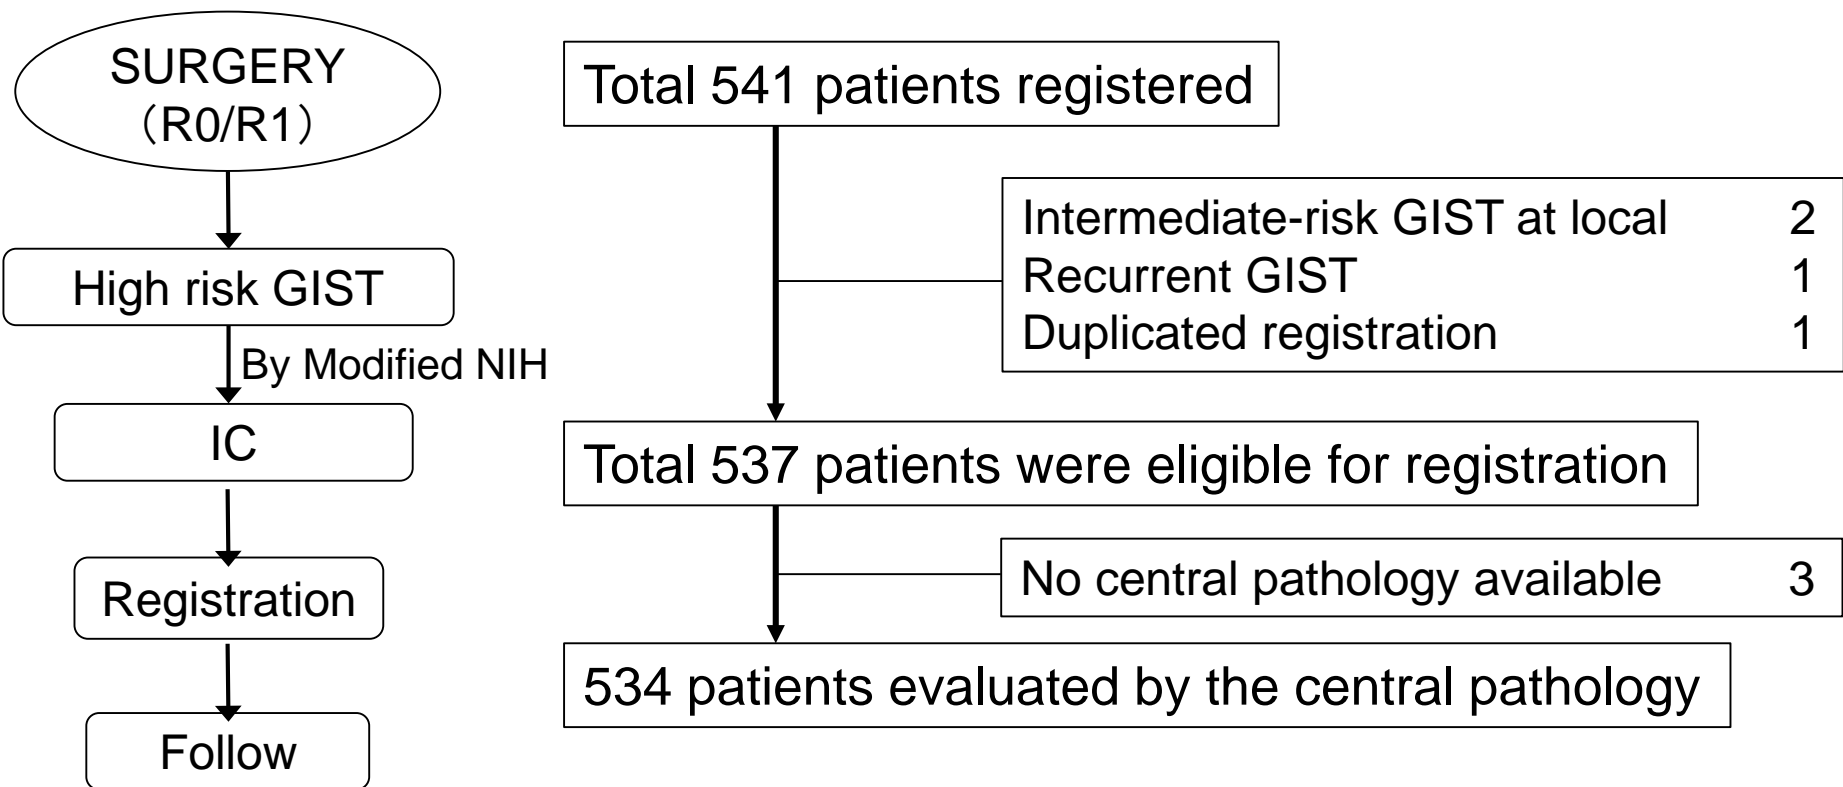

Supplement Figure 2. Concordance in the mitotic count between local and central pathology

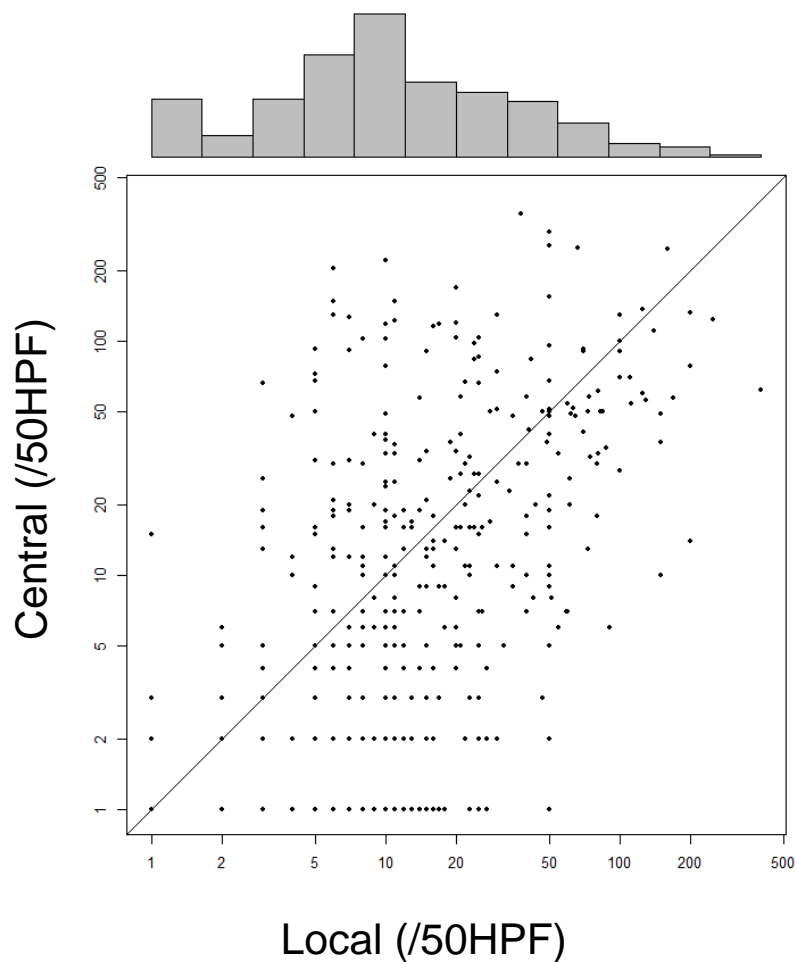

Mitosis (/50HPF)

|         | Median (IQR) | N   |
|---------|--------------|-----|
| Local   | 10 (23 – 5)  | 494 |
| Central | 5 (23 – 1)   | 494 |

Signed rank test:  $P < 0.001$   
 IQR: interquartile range

Spearman's correlation coefficient  
 $r = 0.621$  ( $p < 0.001$ )

Supplement Figure 3. Questionnaire survey to each hospital and investigator

Annual No. of new GIST patients

- <5/year
- $5 \leq <10$
- $10 \leq <20$
- $\geq 20$

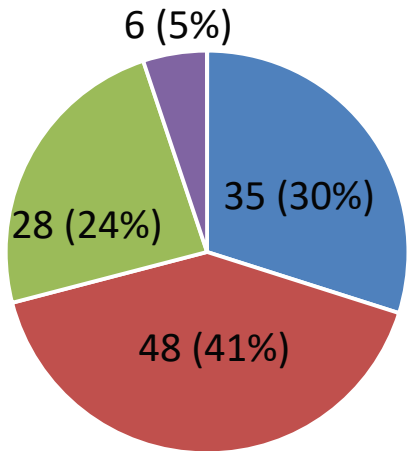

Reference to GIST guidelines

- Yes
- No

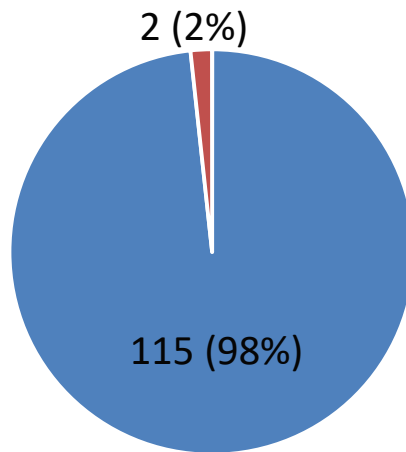

Self-consciousness of guidelines-compliance

- Comply with guidelines
- not always comply
- not comply

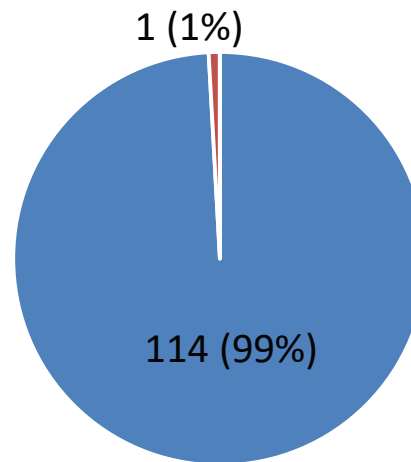

Recommending duration of adjuvant

- no recommendation
- 1 year
- 3 years
- Others

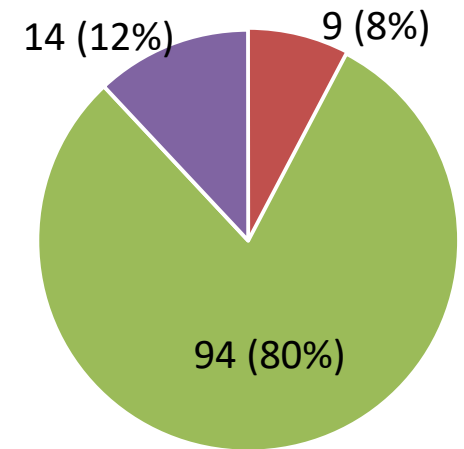

Supplement: 10120_2019_966_MOESM1_ESM.pdf [file 10120_2019_966_MOESM1_ESM.pdf]
